# Supplementary material for: Inhibition of LINK-A lncRNA overcomes ibrutinib resistance in mantle cell lymphoma by regulating Akt/Bcl2 pathway
Source: PeerJ journal article supplement (doi:10.7717/peerj.12571), 2021-12-17

Figure 4

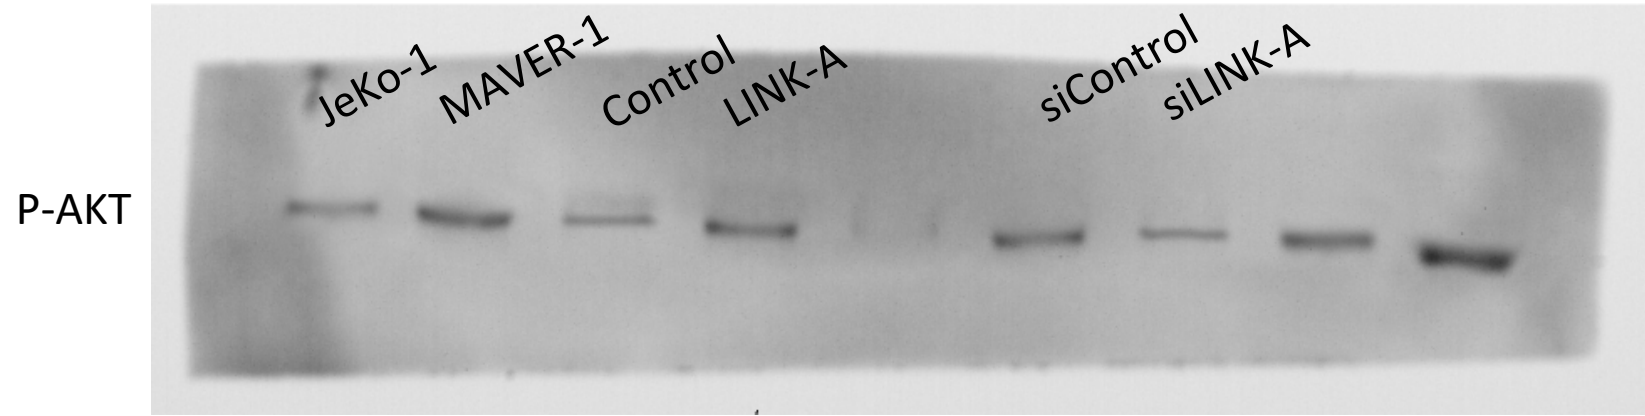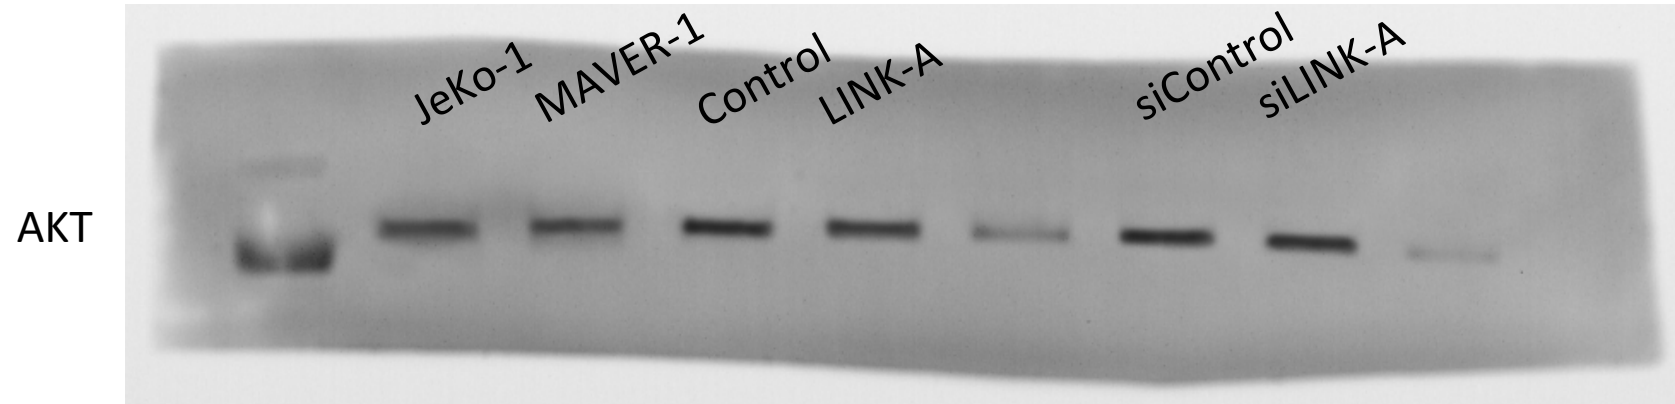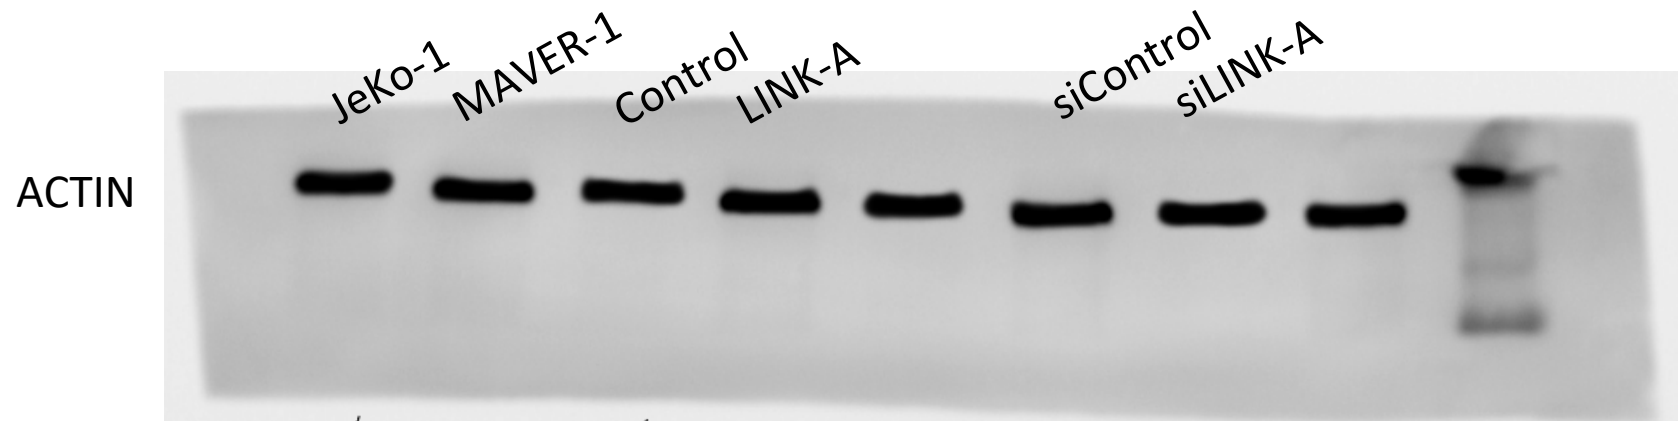

Supplement: Raw-wb.pdf [file Raw-wb.pdf]
