# Supplementary material for: Inhibition of LINK-A lncRNA overcomes ibrutinib resistance in mantle cell lymphoma by regulating Akt/Bcl2 pathway
Source: PeerJ. 2021 Dec 17;9:e12571. doi: 10.7717/peerj.12571 (PMC8686732; doi:10.7717/peerj.12571)
Supplement: Supplemental Information 4 [file peerj-09-12571-s004.xlsx]

## Sheet: f1A qPCR
	18s	f1A	CT2-CT1		∆CT-对照组的∆CT平均值	2的-∆∆CT次幂		2-∆∆CT/对照组的2-∆∆CT均值	平均
	CT1	CT2	∆CT	对照组的∆CT均值	∆∆CT	2-∆∆CT	对照组的2-∆∆CT均值	以对照组的2-∆∆CT均值为1
JeKo-1	11.77	19.84	8.07	8.13	-0.06	1.04247	1.0005	1.04195
	11.72	19.86	8.14	8.13	0.01	0.993092	1.0005	0.992598
	11.68	19.86	8.18	8.13	0.05	0.965936	1.0005	0.965455	1	0.0387792
			8.13			1.0005
Mino	11.65	19.09	7.44	8.13	-0.69	1.61328	1.0005	1.61248
	11.42	18.62	7.2	8.13	-0.93	1.90528	1.0005	1.90433
	11.35	18.41	7.06	8.13	-1.07	2.09943	1.0005	2.09839	1.87173	0.244588
RC-1	11.45	18.76	7.31	8.13	-0.82	1.76541	1.0005	1.76453
	11.56	19.13	7.57	8.13	-0.56	1.47427	1.0005	1.47354
	11.61	18.81	7.2	8.13	-0.93	1.90528	1.0005	1.90433	1.71413	0.219773
MAVER-1	11.71	18.25	6.54	8.13	-1.59	3.01049	1.0005	3.00899
	11.64	18.13	6.49	8.13	-1.64	3.11666	1.0005	3.11511
	11.52	17.82	6.3	8.13	-1.83	3.55537	1.0005	3.5536	3.2259	0.288713
Granta-519	11.47	18.09	6.62	8.13	-1.51	2.8481	1.0005	2.84668
	11.36	17.84	6.48	8.13	-1.65	3.13834	1.0005	3.13677
	11.22	17.63	6.41	8.13	-1.72	3.29436	1.0005	3.29272	3.09206	0.226358
组别
JeKo-1	3	1±0.04
Mino	3	1.87±0.24
RC-1	3	1.71±0.22
MAVER-1	3	3.23±0.29
Granta-519	3	3.09±0.23

## Sheet: F2C qPCR
	18s	f2C	CT2-CT1		∆CT-对照组的∆CT平均值	2的-∆∆CT次幂		2-∆∆CT/对照组的2-∆∆CT均值	平均
	CT1	CT2	∆CT	对照组的∆CT均值	∆∆CT	2-∆∆CT	对照组的2-∆∆CT均值	以对照组的2-∆∆CT均值为1
siCtrl	9.67	20.23	10.56	10.6267	-0.0666667	1.04729	1.0006	1.04667
	9.62	20.26	10.64	10.6267	0.0133333	0.990801	1.0006	0.990206
	9.58	20.26	10.68	10.6267	0.0533333	0.963707	1.0006	0.963129	1	0.0426209
			10.6267			1.0006
siLINK-A	9.47	21.69	12.22	10.6267	1.59333	0.331405	1.0006	0.331206
	9.42	22.02	12.6	10.6267	1.97333	0.254664	1.0006	0.254511
	9.33	21.55	12.22	10.6267	1.59333	0.331405	1.0006	0.331206	0.305641	0.0442798
组别
siCtrl	3	1±0.04
siLINK-A	3	0.31±0.04

## Sheet: F2A qPCR
	18s	f2C	CT2-CT1		∆CT-对照组的∆CT平均值	2的-∆∆CT次幂		2-∆∆CT/对照组的2-∆∆CT均值	平均
	CT1	CT2	∆CT	对照组的∆CT均值	∆∆CT	2-∆∆CT	对照组的2-∆∆CT均值	以对照组的2-∆∆CT均值为1
Control	10.74	20.73	9.99	10.1267	-0.136667	1.09936	1.00293	1.09616
	10.69	20.82	10.13	10.1267	0.00333333	0.997692	1.00293	0.994782
	10.65	20.91	10.26	10.1267	0.133333	0.911722	1.00293	0.909063	1	0.0936552
			10.1267			1.00293
LINK-A	10.53	18.53	8	10.1267	-2.12667	4.36707	1.00293	4.35433
	10.48	18.56	8.08	10.1267	-2.04667	4.1315	1.00293	4.11945
	10.36	18.37	8.01	10.1267	-2.11667	4.33691	1.00293	4.32426	4.26601	0.127815
组别
siCtrl	3	1±0.10
siLINK-A	3	4.27±0.13

## Sheet: F2B cell viability
	Control	LINK-A
	100	135.3
	92.3	157.1
	105.2	146.2

## Sheet: F2D MAVER-1 cell viability
	siCtrl	siLINK-A
	100	67.5
	92.6	59.3
	102.3	61.8
	98.3	62.8667
	1.62635	4.03051

## Sheet: F2F Jeko-1 TUNEL
	Vehicle	Ibru	Ibru+LINK-A
	4.00	26.00	12.00
	7.00	31.00	15.00
	6.00	29.00	13.00

## Sheet: F2H MAVER-1 TUNEL
	Vehicle	Ibru	Ibru+LINK-A
	6.00	14.00	28.00
	4.00	11.00	31.00
	5.00	15.00	33.00
