# Supplementary material for: Inhibition of LINK-A lncRNA overcomes ibrutinib resistance in mantle cell lymphoma by regulating Akt/Bcl2 pathway
Source: PeerJ. 2021 Dec 17;9:e12571. doi: 10.7717/peerj.12571 (PMC8686732; doi:10.7717/peerj.12571)
Supplement: Supplemental Information 5 [file peerj-09-12571-s005.xlsx]

## Sheet: F3A qpcr-BCL2
	18s	BcI2	CT2-CT1		∆CT-对照组的∆CT平均值	2的-∆∆CT次幂		2-∆∆CT/对照组的2-∆∆CT均值	平均
	CT1	CT2	∆CT	对照组的∆CT均值	∆∆CT	2-∆∆CT	对照组的2-∆∆CT均值	以对照组的2-∆∆CT均值为1
Control	10.77	19.66	8.89	9.19667	-0.306667	1.23685	1.01244	1.22166
	10.68	19.96	9.28	9.19667	0.0833333	0.943874	1.01244	0.932281
	10.62	20.04	9.42	9.19667	0.223333	0.856584	1.01244	0.846063	1	0.19674
			9.19667			1.01244
link-A	10.55	17.05	6.5	9.19667	-2.69667	6.48302	1.01244	6.4034
	10.43	17.18	6.75	9.19667	-2.44667	5.45155	1.01244	5.38459
	10.35	17.11	6.76	9.19667	-2.43667	5.41389	1.01244	5.3474	5.7118	0.599232
组别
Control	3	1±0.20
link-A	3	5.71±0.60

## Sheet: qpcr-TOSO
	18s	TOSO	CT2-CT1		∆CT-对照组的∆CT平均值	2的-∆∆CT次幂		2-∆∆CT/对照组的2-∆∆CT均值	平均
	CT1	CT2	∆CT	对照组的∆CT均值	∆∆CT	2-∆∆CT	对照组的2-∆∆CT均值	以对照组的2-∆∆CT均值为1
Control	10.77	19.83	9.06	9.36667	-0.306667	1.23685	1.0175	1.21558
	10.68	20.0	9.32	9.36667	-0.0466667	1.03288	1.0175	1.01511
	10.62	20.34	9.72	9.36667	0.353333	0.782773	1.0175	0.769312	1	0.223516
			9.36667			1.0175
link-A	10.55	18.45	7.9	9.36667	-1.46667	2.76383	1.0175	2.71629
	10.43	18.98	8.55	9.36667	-0.816667	1.76133	1.0175	1.73104
	10.35	18.48	8.13	9.36667	-1.23667	2.35653	1.0175	2.31601	2.25445	0.495503
组别
Control	3	1±0.22
link-A	3	2.25±0.50

## Sheet: qpcr-PIK3CD
	18s	PIK3CD	CT2-CT1		∆CT-对照组的∆CT平均值	2的-∆∆CT次幂		2-∆∆CT/对照组的2-∆∆CT均值	平均
	CT1	CT2	∆CT	对照组的∆CT均值	∆∆CT	2-∆∆CT	对照组的2-∆∆CT均值	以对照组的2-∆∆CT均值为1
Control	10.77	18.74	7.97	8.03667	-0.0666667	1.04729	1.00068	1.04658
	10.68	18.72	8.04	8.03667	0.00333333	0.997692	1.00068	0.997015
	10.62	18.72	8.1	8.03667	0.0633333	0.95705	1.00068	0.956401	1	0.0451653
			8.03667			1.00068
link-A	10.55	18.35	7.8	8.03667	-0.236667	1.17827	1.00068	1.17747
	10.43	18.37	7.94	8.03667	-0.0966667	1.0693	1.00068	1.06857
	10.35	18.46	8.11	8.03667	0.0733333	0.950439	1.00068	0.949795	1.06528	0.113872
组别
Control	3	1±0.04
link-A	3	1.06±0.11

## Sheet: qpcr-IKBKB
	18s	IKBKB	CT2-CT1		∆CT-对照组的∆CT平均值	2的-∆∆CT次幂		2-∆∆CT/对照组的2-∆∆CT均值	平均
	CT1	CT2	∆CT	对照组的∆CT均值	∆∆CT	2-∆∆CT	对照组的2-∆∆CT均值	以对照组的2-∆∆CT均值为1
Control	10.77	19.15	8.38	8.66	-0.28	1.21419	1.0115	1.20039
	10.68	19.59	8.91	8.66	0.25	0.840896	1.0115	0.831333
	10.62	19.31	8.69	8.66	0.03	0.97942	1.0115	0.968281	1	0.18656
			8.66			1.0115
linkA	10.55	18.67	8.12	8.66	-0.54	1.45397	1.0115	1.43744
	10.43	19.36	8.93	8.66	0.27	0.82932	1.0115	0.819888
	10.35	18.73	8.38	8.66	-0.28	1.21419	1.0115	1.20039	1.15257	0.311539
组别
Control	3	1±0.19
link-A	3	1.15±0.31

## Sheet: qpcr-TNFRSF7
	18s	TNFRSF7	CT2-CT1		∆CT-对照组的∆CT平均值	2的-∆∆CT次幂		2-∆∆CT/对照组的2-∆∆CT均值	平均
	CT1	CT2	∆CT	对照组的∆CT均值	∆∆CT	2-∆∆CT	对照组的2-∆∆CT均值	以对照组的2-∆∆CT均值为1
Control	10.77	18.67	7.9	8.00333	-0.103333	1.07425	1.00161	1.07252
	10.68	18.69	8.01	8.00333	0.00666667	0.99539	1.00161	0.993788
	10.62	18.72	8.1	8.00333	0.0966667	0.935191	1.00161	0.933687	1	0.069627
			8.00333			1.00161
linkA	10.77	17.43	6.66	8.00333	-1.34333	2.53737	1.00161	2.53329
	10.68	17.44	6.76	8.00333	-1.24333	2.36745	1.00161	2.36364
	10.62	17.37	6.75	8.00333	-1.25333	2.38392	1.00161	2.38008	2.42567	0.0935614
组别
Control	3	1±0.07
link-A	3	2.42±0.09

## Sheet: CASP7
	18s	IKBKB	CT2-CT1		∆CT-对照组的∆CT平均值	2的-∆∆CT次幂		2-∆∆CT/对照组的2-∆∆CT均值	平均
	CT1	CT2	∆CT	对照组的∆CT均值	∆∆CT	2-∆∆CT	对照组的2-∆∆CT均值	以对照组的2-∆∆CT均值为1
Control	10.77	19.71	8.94	9.23	-0.29	1.22264	1.0109	1.20945
	10.68	20.0	9.32	9.23	0.09	0.939523	1.0109	0.929388
	10.62	20.05	9.43	9.23	0.2	0.870551	1.0109	0.86116	1	0.184571
			9.23			1.0109
linkA	10.55	20.26	9.71	9.23	0.48	0.716978	1.0109	0.709244
	10.43	20.46	10.03	9.23	0.8	0.574349	1.0109	0.568154
	10.35	19.96	9.61	9.23	0.38	0.768438	1.0109	0.760149	0.679182	0.099465
组别
Control	3	1±0.18
link-A	3	0.68±0.10

## Sheet: qpcr-STK17A
	18s	STK17A	CT2-CT1		∆CT-对照组的∆CT平均值	2的-∆∆CT次幂		2-∆∆CT/对照组的2-∆∆CT均值	平均
	CT1	CT2	∆CT	对照组的∆CT均值	∆∆CT	2-∆∆CT	对照组的2-∆∆CT均值	以对照组的2-∆∆CT均值为1
Control	10.77	18.96	8.19	8.29	-0.1	1.07177	1.00177	1.06988
	10.68	18.96	8.28	8.29	-0.01	1.00696	1.00177	1.00517
	10.62	19.02	8.4	8.29	0.11	0.926588	1.00177	0.924949	1	0.0726027
			8.29			1.00177
linkA	10.55	18.87	8.32	8.29	0.03	0.97942	1.00177	0.977687
	10.43	18.46	8.03	8.29	-0.26	1.19748	1.00177	1.19536
	10.35	18.49	8.14	8.29	-0.15	1.10957	1.00177	1.10761	1.09355	0.109515
组别
Control	3	1±0.07
link-A	3	1.09±0.11

## Sheet: qpcr-CSE1L
	18s	CSE1L	CT2-CT1		∆CT-对照组的∆CT平均值	2的-∆∆CT次幂		2-∆∆CT/对照组的2-∆∆CT均值	平均
	CT1	CT2	∆CT	对照组的∆CT均值	∆∆CT	2-∆∆CT	对照组的2-∆∆CT均值	以对照组的2-∆∆CT均值为1
Control	10.77	20.23	9.46	9.88333	-0.423333	1.34102	1.03397	1.29696
	10.68	21.06	10.38	9.88333	0.496667	0.708742	1.03397	0.685458
	10.62	20.43	9.81	9.88333	-0.0733333	1.05214	1.03397	1.01758	1	0.306132
			9.88333			1.03397
linkA	10.55	20.57	10.02	9.88333	0.136667	0.909618	1.03397	0.879734
	10.43	20.41	9.98	9.88333	0.0966667	0.935191	1.03397	0.904467
	10.35	20.31	9.96	9.88333	0.0766667	0.948246	1.03397	0.917092	0.900431	0.0190034
组别
Control	3	1±0.31
link-A	3	0.90±0.02

## Sheet: qpcr-STK17B
	18s	STK17B	CT2-CT1		∆CT-对照组的∆CT平均值	2的-∆∆CT次幂		2-∆∆CT/对照组的2-∆∆CT均值	平均
	CT1	CT2	∆CT	对照组的∆CT均值	∆∆CT	2-∆∆CT	对照组的2-∆∆CT均值	以对照组的2-∆∆CT均值为1
Control	10.77	20.61	9.84	10.1067	-0.266667	1.20303	1.00884	1.19249
	10.68	20.91	10.23	10.1067	0.123333	0.918064	1.00884	0.910021
	10.62	20.87	10.25	10.1067	0.143333	0.905425	1.00884	0.897493	1	0.166815
			10.1067			1.00884
linkA	10.55	20.61	10.06	10.1067	-0.0466667	1.03288	1.00884	1.02383
	10.43	20.27	9.84	10.1067	-0.266667	1.20303	1.00884	1.19249
	10.35	20.23	9.88	10.1067	-0.226667	1.17013	1.00884	1.15988	1.1254	0.0894602
组别
Control	3	1±0.17
link-A	3	1.13±0.09

## Sheet: qpcr-BIRC5
	18s	BIRC5	CT2-CT1		∆CT-对照组的∆CT平均值	2的-∆∆CT次幂		2-∆∆CT/对照组的2-∆∆CT均值	平均
	CT1	CT2	∆CT	对照组的∆CT均值	∆∆CT	2-∆∆CT	对照组的2-∆∆CT均值	以对照组的2-∆∆CT均值为1
Control	10.77	19.93	9.16	9.38	-0.22	1.16473	1.00634	1.15739
	10.68	20.12	9.44	9.38	0.06	0.959264	1.00634	0.95322
	10.62	20.16	9.54	9.38	0.16	0.895025	1.00634	0.889386	1	0.139995
			9.38			1.00634
linkA	10.55	20.62	10.07	9.38	0.69	0.619854	1.00634	0.615948
	10.43	20.18	9.75	9.38	0.37	0.773782	1.00634	0.768907
	10.35	20.28	9.93	9.38	0.55	0.68302	1.00634	0.678716	0.687857	0.076888
组别
Control	3	1±0.14
link-A	3	0.69±0.08

[truncated: 19 more sheets: qpcr-BCI2, TOSO, PIK3CD, IKBKB, TNFRSF7, CASP7., STK17A., CSE1L., STK17B., BIRC5., F3D Jeko1 WB, F3G MAVER1 wb, F3E jeko-1 cell viability, F3H MAVER-1 cell, F4D qPCR LINK-A-MK206, F4E Jeko1 cell viability, F4F  jeko apoptosis, supp FigS1-SIBCL2 qPCR, supp FigS1-overbcl2 qPCR]
